# Supplementary material
Source: PubMed Central journal article supplement (PMC2567473)
Supplement: 0802636105_0802636105SI.pdf [file 0802636105_0802636105SI.pdf]

# Supporting Information

Kumaki *et al.* 10.1073/pnas.0802636105

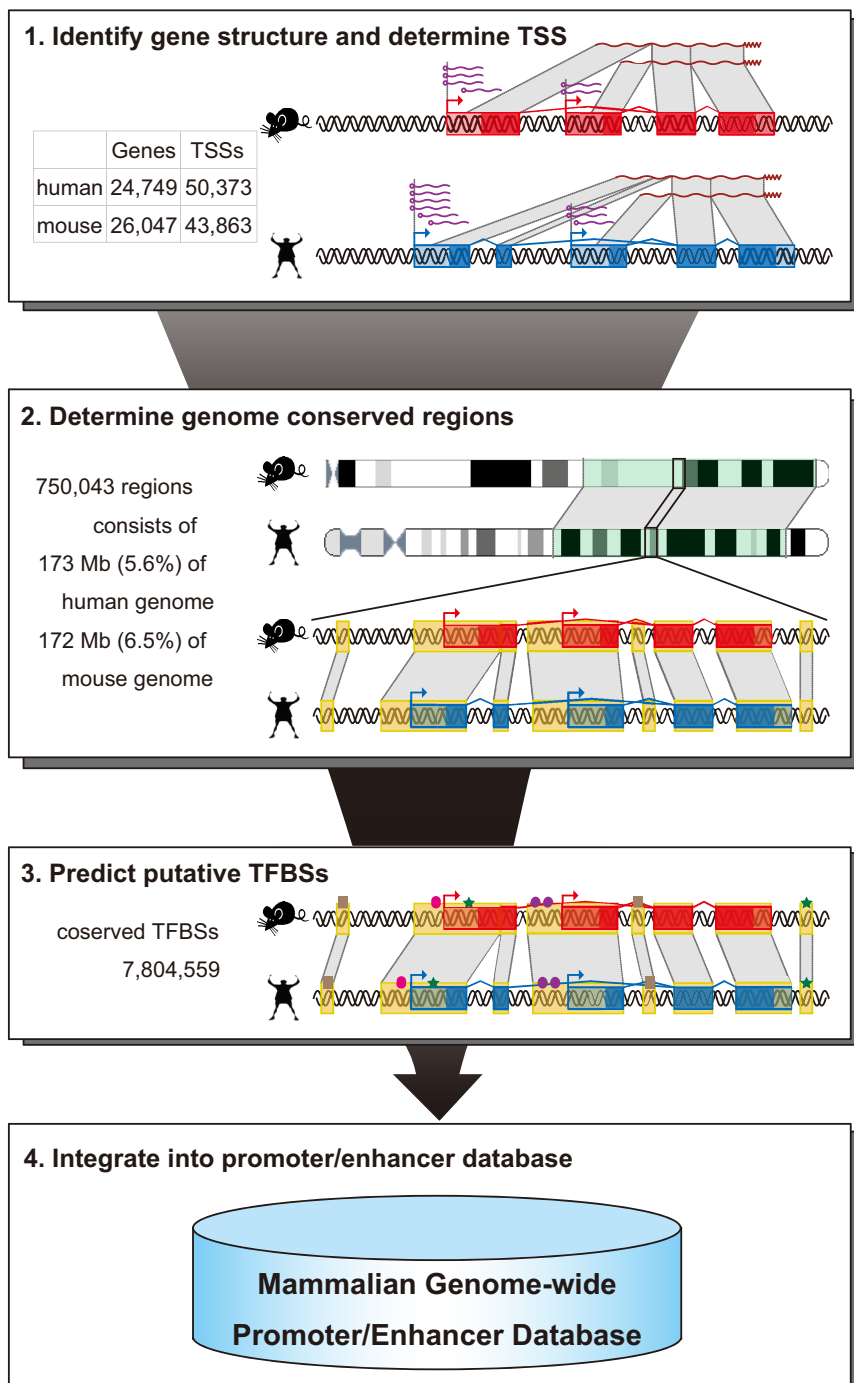

**Fig. S1.** Construction of the mammalian promoter/enhancer database. Mammalian full-length cDNA and EST sequences were mapped onto mammalian genome sequences to identify 24,749 human genes with 50,373 TSSs and 26,047 mouse genes with 43,863 TSSs. These mammalian genes were then compared to identify 16,268 human-mouse orthologs (65.7% of human genes and 62.5% of mouse genes). The positional information of adjacent orthologs was used to determine 434 human-mouse syntenic regions, which contained 750,043 human-mouse conserved genomic regions. The 862 consensus TFBSs from TRANSFAC were then mapped on these conserved genomic regions to identify the 7,804,559 sites conserved between human and mouse in non-coding regions. Human-rat comparisons were performed using the same procedure. Finally, visualization of putative promoter/enhancer and TFBSs data, and curation of current genes were integrated into a free and publicly accessible website (Mammalian Promoter/Enhancer Database; <http://promoter.cdb.riken.jp/>).





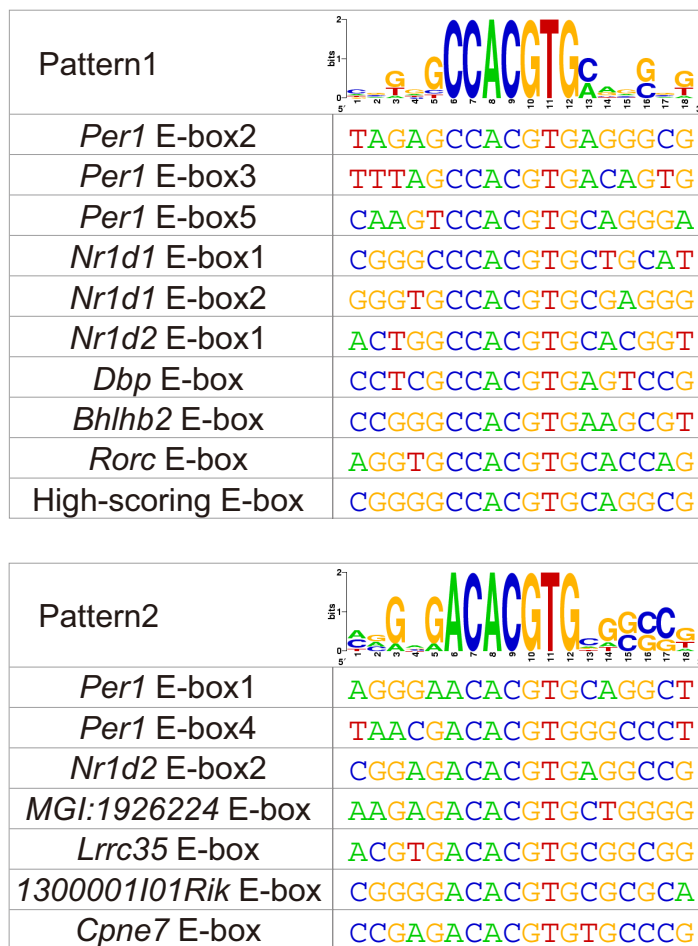

**Fig. S4.** Two patterns revealed in the adjacent sequence of high-amplitude E-boxes. High-amplitude E-box sequences classified into two patterns were shown. Information contents of the relative frequency of each nucleic acid at the position of the pattern were shown by sequence logos.



## Other Supporting Information Files

[SI Appendix](#)

**Table S1.** Functional RREs from known clock-controlled genes used in this study

| Gene                                                                                                                                            | GeneID | Element | Organism | chr | Start     | End       | Sequence                           | Evidence       | Affymetrix Probe ID  |
|-------------------------------------------------------------------------------------------------------------------------------------------------|--------|---------|----------|-----|-----------|-----------|------------------------------------|----------------|----------------------|
| <i>Elov15</i>                                                                                                                                   | 68801  | RRE     | Mouse    | 9   | 78317303  | 78317325  | Mouse TCTTGTAAATGGGTCAATGGCGT<br>  | ref. 1, ref. 2 | 93496_at             |
|                                                                                                                                                 |        |         | Human    | 6   | 53273932  | 53273910  | Human TTGTGCAAAGTAGGTCAATGCCGT     |                |                      |
| <i>BC004004</i>                                                                                                                                 | 80748  | RRE     | Mouse    | 17  | 27851244  | 27851266  | Mouse AGTCTGAATATAGGTCAATGTGA<br>  | ref. 1, ref. 2 | 95517_i_at           |
|                                                                                                                                                 |        |         | Human    | 6   | 36927126  | 36927148  | Human TTTGGGAATCTAGGTCAATTCTGA     |                |                      |
| <i>Macf1</i>                                                                                                                                    | 11426  | RRE     | Mouse    | 4   | 121994185 | 121994207 | Mouse CCCTGAAAAGTAGGTCAATGCCCT<br> | ref. 2         | 98402_at             |
|                                                                                                                                                 |        |         | Human    | 1   | 39277738  | 39277716  | Human CCCTGAAAAGTAGGTCAATGCCCT     |                |                      |
| <i>Atf5</i>                                                                                                                                     | 107503 | RRE     | Mouse    | 7   | 32213618  | 32213640  | Mouse CAAGTAAACTGGGTCAATCGAAGG<br> | ref. 1, ref. 2 | 103006_at            |
|                                                                                                                                                 |        |         | Human    | 19  | 55118372  | 55118350  | Human GGAGGGTAACTGGGTCAATCGCAGG    |                |                      |
| <i>Col4a1</i>                                                                                                                                   | 12826  | RRE1    | Mouse    | 8   | 11309356  | 11309378  | Mouse GGCAGGAAAATGGGTCAATGCCTG<br> | ref. 1, ref. 2 | 101093_at            |
|                                                                                                                                                 |        |         | Human    | 13  | 109748860 | 109748882 | Human AGCAGGAAAATGGGTCAATGATG      |                |                      |
| <i>Col4a1</i>                                                                                                                                   | 12826  | RRE2    | Mouse    | 8   | 11337102  | 11337124  | Mouse TCAGCCAAACTAGGTCAAAACCT<br>  | ref. 1, ref. 2 | 101093_at            |
|                                                                                                                                                 |        |         | Human    | 13  | 109781193 | 109781215 | Human TCAGCCAAAATAGGTCAAAACAG      |                |                      |
| <i>D19Ert721e</i>                                                                                                                               | 225896 | RRE     | Mouse    | 19  | 7972840   | 7972862   | Mouse AGGAAGAAAATAGGTCAATGATG<br>  | ref. 1, ref. 2 | 97240_g_at, 97241_at |
|                                                                                                                                                 |        |         | Human    | 11  | 62201916  | 62201894  | Human AAGAAGAAATAGGTCAATGATC       |                |                      |
| References                                                                                                                                      |        |         |          |     |           |           |                                    |                |                      |
| 1. Ueda HR, <i>et al.</i> (2002) A transcription factor response element for gene expression during circadian night. <i>Nature</i> 418:534-539. |        |         |          |     |           |           |                                    |                |                      |
| 2. Panda S, <i>et al.</i> (2002) Coordinated transcription of key pathways in the mouse by the circadian clock. <i>Cell</i> 109:307-320.        |        |         |          |     |           |           |                                    |                |                      |

Element information on the gene symbol ('Gene'), NCBI GeneID ('GeneID'), element type ('Element'), the position ('Start' and 'End') on a chromosome ('chr') of mouse and human ('Organism') and the sequence alignment of human-mouse RREs ('Sequence') are indicated. Experimental evidence on clock-controlled genes ('Evidence') and Affymetrix probe ID detecting circadian expression of the genes ('Affymetrix Probe ID') are also indicated. The canonical consensus sequences for the RRE ([A/T]A[A/T]NT[A/G]GGTCA) is indicated in red. The function of these mouse RREs sequences in the context of a luciferase reporter was experimentally determined in **Fig. S2**.



**Table S2.** Functional clock-controlled elements used as train HMMs

| Gene          | GeneID | Element | Organism | chr | Start     | End       | Score of HMMER | Sequence                           | Evidence |
|---------------|--------|---------|----------|-----|-----------|-----------|----------------|------------------------------------|----------|
| <i>Per1</i>   | 18626  | E-box 1 | Mouse    | 11  | 68707450  | 68707433  | 15.39          | AGGGAA <b>CACGT</b> GCAGGCT        | ref. 1   |
| <i>Per1</i>   | 18626  | E-box 2 | Mouse    | 11  | 68707634  | 68707617  | 17.87          | TAGAGCC <b>CACGT</b> GAGGGCG       | ref. 1   |
| <i>Per1</i>   | 18626  | E-box 3 | Mouse    | 11  | 68710224  | 68710241  | 11.48          | TTTAGCC <b>CACGT</b> GACAGTG       | ref. 1   |
| <i>Per1</i>   | 18626  | E-box 4 | Mouse    | 11  | 68710970  | 68710987  | 12.10          | TAACGA <b>CACGT</b> GGGCCCT        | ref. 1   |
| <i>Per1</i>   | 18626  | E-box 5 | Mouse    | 11  | 68711333  | 68711350  | 13.45          | CAAGTC <b>CACGT</b> GCAGGGA        | ref. 2   |
| <i>Nr1d1</i>  | 217166 | E-box 1 | Mouse    | 11  | 98445288  | 98445271  | 14.71          | CGGGCC <b>CACGT</b> GCTGCAT        | ref. 2   |
| <i>Nr1d1</i>  | 217166 | E-box 2 | Mouse    | 11  | 98445008  | 98444991  | 15.77          | GGGTGC <b>CACGT</b> GCGAGGG        | ref. 2   |
| <i>Nr1d2</i>  | 353187 | E-box 1 | Mouse    | 14  | 14904545  | 14904528  | 16.38          | ACTGGC <b>CACGT</b> GCACGGT        | ref. 2   |
| <i>Nr1d2</i>  | 353187 | E-box 2 | Mouse    | 14  | 14904442  | 14904425  | 17.71          | CGGAGA <b>CACGT</b> GAGGCCG        | ref. 2   |
| <i>Dbp</i>    | 13170  | E-box   | Mouse    | 7   | 33110149  | 33110166  | 15.23          | CCTCGC <b>CACGT</b> GAGTCCG        | ref. 2   |
| <i>Bhlhb2</i> | 20893  | E-box   | Mouse    | 6   | 109049680 | 109049697 | 18.55          | CCGGGC <b>CACGT</b> GAAGCGT        | ref. 2   |
| <i>Rorc</i>   | 19885  | E-box   | Mouse    | 3   | 94357502  | 94357519  | 16.45          | AGGTGC <b>CACGT</b> GCACCAG        | ref. 2   |
|               |        |         |          |     |           |           |                |                                    |          |
| <i>Per1</i>   | 18626  | D-box   | Mouse    | 11  | 68711473  | 68711496  | 17.30          | GCCTGGCAT <b>TTATGCAA</b> CCCGCCTC | ref. 2   |
| <i>Per2</i>   | 18627  | D-box   | Mouse    | 1   | 91377818  | 91377795  | 16.48          | TGTGCGTCT <b>TTATGTAA</b> AGAGAGCG | ref. 2   |
| <i>Per3</i>   | 18628  | D-box 1 | Mouse    | 4   | 148930820 | 148930797 | 18.62          | CCCGCGGT <b>TTATGTAA</b> GGTACTCG  | ref. 2   |
| <i>Per3</i>   | 18628  | D-box 2 | Mouse    | 4   | 148930773 | 148930750 | 16.10          | GCCCGCGGT <b>TTATGTAA</b> CCCCGCC  | ref. 2   |
| <i>Nr1d1</i>  | 217166 | D-box   | Mouse    | 11  | 98445195  | 98445218  | 19.41          | GGAGCTCAT <b>TTATGTAA</b> CGAGGCCG | ref. 2   |

|                   |        |         |       |    |           |           |       |                            |            |
|-------------------|--------|---------|-------|----|-----------|-----------|-------|----------------------------|------------|
| <i>Nr1d2</i>      | 353187 | D-box   | Mouse | 14 | 14904456  | 14904479  | 17.41 | AGCTCGCATTTATGTAA TGCTGCGT | ref. 2     |
| <i>Rora</i>       | 19883  | D-box 1 | Mouse | 9  | 69195245  | 69195222  | 11.78 | AAGCTGTTTATGTAA TAGCTTTG   | ref. 2     |
| <i>Rora</i>       | 19883  | D-box 2 | Mouse | 9  | 68926158  | 68926135  | 16.84 | CACTGCTGTTATGTAA CCAAACGT  | ref. 2     |
| <i>Rora</i>       | 19883  | D-box 3 | Mouse | 9  | 68894279  | 68894302  | 17.42 | CGAGCGGGTTATGTAA CAGGGTTA  | ref. 2     |
| <i>Rorb</i>       | 225998 | D-box   | Mouse | 19 | 18304970  | 18304993  | 14.84 | TCCAGTTC TATGTAA TGAATATA  | ref. 2     |
|                   |        |         |       |    |           |           |       |                            |            |
| <i>Arntl</i>      | 11865  | RRE     | Mouse | 7  | 100478066 | 100478088 | 19.72 | AGGCAGAAAGTAGGTCA GGGACG   | ref. 2     |
| <i>Npas2</i>      | 18143  | RRE     | Mouse | 1  | 39516271  | 39516293  | 14.66 | GAAAAATATGTAGGTCA GTGGAA   | ref. 2     |
| <i>Nfil3</i>      | 114519 | RRE 1   | Rat   | 17 | 18094293  | 18094271  | 15.64 | AGTGTGTTAGTAGGTCA GTTCCG   | ref. 2     |
| <i>Nfil3</i>      | 18030  | RRE 2   | Mouse | 13 | 52011542  | 52011520  | 21.79 | ACAGAAAAGTGGGTCA GTTTGT    | ref. 2     |
| <i>Clock</i>      | 12753  | RRE     | Mouse | 5  | 75037420  | 75037442  | 15.91 | AGGAATAAAGTGGGTCA CAAGGC   | ref. 2     |
| <i>Cry1</i>       | 12952  | RRE 1   | Mouse | 10 | 84829678  | 84829656  | 20.81 | GACTAGAAAGTAGGTCA TTGTGA   | ref. 2     |
| <i>Cry1</i>       | 12952  | RRE 2   | Mouse | 10 | 84829601  | 84829623  | 16.47 | GTTTCTAAAGTAGGTCA TCGCTA   | ref. 2     |
| <i>Rorc</i>       | 19885  | RRE     | Mouse | 3  | 94352279  | 94352301  | 19.40 | GGAATAAAGTGGGTCA TCTTGT    | ref. 2     |
| <i>Elov15</i>     | 68801  | RRE     | Mouse | 9  | 78317303  | 78317325  | 17.19 | TCTTGTAAATTGGGTCA TGGCGT   | This study |
| <i>BC004004</i>   | 80748  | RRE     | Mouse | 17 | 27851266  | 27851244  | 17.53 | AGTCTGAATATAGGTCA ATGTGA   | This study |
| <i>Macf1</i>      | 11426  | RRE 2   | Mouse | 4  | 121994185 | 121994207 | 20.05 | CCCTGAAAAGTAGGTCA GTGCCT   | This study |
| <i>Atf5</i>       | 107503 | RRE     | Mouse | 7  | 32213618  | 32213640  | 14.65 | CAAGTAAAAGTGGGTCA CGAAGG   | This study |
| <i>Col4a1</i>     | 12826  | RRE 1   | Mouse | 8  | 11309378  | 11309356  | 19.92 | GGCAGGAAAATGGGTCA GTGCTG   | This study |
| <i>Col4a1</i>     | 12826  | RRE 2   | Mouse | 8  | 11337124  | 11337102  | 14.10 | TCAGCCAAACTAGGTCA AAAACCT  | This study |
| <i>D19Erd721e</i> | 225896 | RRE     | Mouse | 19 | 7972862   | 7972840   | 18.30 | AGGAAGAAAATAGGTCA GACATG   | This study |

|                                                                                                                                                                                                                                                                                                                                                                                                                                 |  |  |  |  |  |  |
|---------------------------------------------------------------------------------------------------------------------------------------------------------------------------------------------------------------------------------------------------------------------------------------------------------------------------------------------------------------------------------------------------------------------------------|--|--|--|--|--|--|
|                                                                                                                                                                                                                                                                                                                                                                                                                                 |  |  |  |  |  |  |
| <p>References</p> <ol style="list-style-type: none"> <li>Hida A, <i>et al.</i> (2000) The human and mouse Period1 genes: five well-conserved E-boxes additively contribute to the enhancement of mPer1 transcription. <i>Genomics</i> 65:224-233.</li> <li>Ueda HR, <i>et al.</i> (2005) System-level identification of transcriptional circuits underlying mammalian circadian clocks. <i>Nat Genet</i> 37:187-192.</li> </ol> |  |  |  |  |  |  |

Element information on the gene symbol ('Gene'), NCBI GeneID ('GeneID'), element type ('Element'), the position ('Start' and 'End') on a chromosome ('chr') of mouse and rat ('Organism') and the sequence ('Sequence') are indicated. Experimental evidence on functional clock-controlled elements ('Evidence') and match score of HMMER search performed using the constructed HMMs ('Score of HMMER') is also indicated. Canonical consensus sequences for the E-box (CACGTG), D-box (TTATG[T/C]AA) and RRE ([A/T]A[A/T]NT[A/G]GGTCA) are indicated in red. Information contents of the relative frequency of each nucleic acid at the position of the pattern for each element were shown by sequence logos.



|    |                 |        |       |       |       |    |           |           |       |       |                               |
|----|-----------------|--------|-------|-------|-------|----|-----------|-----------|-------|-------|-------------------------------|
| 9  | <i>Jag2</i>     | 16450  | E-box | 0.024 | Mouse | 12 | 107682267 | 107682284 | 15.64 | Mouse | CCTGGCCACGTGGGCGCG<br>        |
|    |                 |        |       |       | Human | 14 | 104704954 | 104704971 | 15.64 | Human | CCTGGCCACGTGGGCGCG            |
| 10 | <i>Rps19</i>    | 20085  | E-box | 0.024 | Mouse | 7  | 13623927  | 13623944  | 15.62 | Mouse | CGCGGCCACGTGCGAGCG<br>        |
|    |                 |        |       |       | Human | 19 | 47056319  | 47056336  | 15.62 | Human | CGCGGCCACGTGCGAGCG            |
| -  | <i>Per3</i>     | 18628  | D-box | 0     | Mouse | 4  | 148930797 | 148930820 | 18.62 | Mouse | CCCGCGCGTTATGTAAGGTACTCG<br>  |
|    |                 |        |       |       | Human | 1  | 7778455   | 7778432   | 21.11 | Human | CCCGCGCGTTATGTAACGCGCCCC      |
| 1  | <i>Gria2</i>    | 14800  | D-box | 0.051 | Mouse | 3  | 81194005  | 81193982  | 17.31 | Mouse | CGGGGCTGTTACATAATGCCACC<br>   |
|    |                 |        |       |       | Human | 4  | 158501155 | 158501178 | 17.63 | Human | CGGGGCTGTTACATAACGCCACC       |
| 2  | <i>Spry4</i>    | 24066  | D-box | 0.122 | Mouse | 18 | 39043332  | 39043309  | 16.38 | Mouse | AGGTGCGTTTACATAACGCCGGGC<br>  |
|    |                 |        |       |       | Human | 5  | 141683774 | 141683751 | 16.80 | Human | AGGTGCGTTTACATAACACCAGGC      |
| 3  | <i>Etv4</i>     | 18612  | D-box | 0.181 | Mouse | 11 | 101455967 | 101455990 | 17.09 | Mouse | CACACGTC TTATGTAACCCAGTTC<br> |
|    |                 |        |       |       | Human | 17 | 38978809  | 38978832  | 15.20 | Human | ACACGTC TTATGTAACCGAGCCC      |
| 4  | <i>Pogz</i>     | 229584 | D-box | 0.181 | Mouse | 3  | 94832639  | 94832662  | 16.89 | Mouse | CCCCTGTGTTATGTAATCCCCTC<br>   |
|    |                 |        |       |       | Human | 1  | 148244037 | 148244014 | 15.15 | Human | CCCTTGTGTTATGTAATCTCTGCT      |
| 5  | <i>Fmn2</i>     | 54418  | D-box | 0.209 | Mouse | 1  | 174628879 | 174628902 | 14.89 | Mouse | ACCGCGCATTTATGCAAAGCGGCAG<br> |
|    |                 |        |       |       | Human | 1  | 236581260 | 236581283 | 16.89 | Human | GCCGCGCATTTATGCAAAGCGGCGG     |
| 6  | <i>Plcb1</i>    | 18795  | D-box | 0.325 | Mouse | 2  | 134535724 | 134535747 | 15.25 | Mouse | GGGGCGCGTTATGCAATGGGGCGC<br>  |
|    |                 |        |       |       | Human | 20 | 8061473   | 8061496   | 15.25 | Human | GGGGCGCGTTATGCAATGGGGCGCA     |
| 7  | <i>Irf2bp1</i>  | 272359 | D-box | 0.363 | Mouse | 7  | 10526613  | 10526636  | 16.21 | Mouse | CCCGCGCGTTATGTAACCTTCCCT<br>  |
|    |                 |        |       |       | Human | 19 | 51081280  | 51081257  | 13.67 | Human | CAGGCGTGTTATGTAACCTTCCCT      |
| 8  | <i>Slc22a20</i> | 381203 | D-box | 0.363 | Mouse | 19 | 5775101   | 5775078   | 14.95 | Mouse | CTGCCTTTTACATAAGGCCTGGG<br>   |
|    |                 |        |       |       | Human | 11 | 64737873  | 64737896  | 14.81 | Human | CGGCCTCTTACATAAAGCCGGGG       |
| 9  | <i>Trim8</i>    | 93679  | D-box | 0.387 | Mouse | 19 | 45844359  | 45844336  | 14.62 | Mouse | GACACTCATTACATAAACAGCAGC<br>  |
|    |                 |        |       |       |       |    |           |           |       | Human | GACACTCATTACATAAACAGCAGC      |

|    |                      |        |       |       |       |    |           |           |       |       |                              |
|----|----------------------|--------|-------|-------|-------|----|-----------|-----------|-------|-------|------------------------------|
|    |                      |        |       |       | Human | 10 | 104395331 | 104395308 | 14.62 |       |                              |
| 10 | <i>Tspan7</i>        | 21912  | D-box | 0.388 | Mouse | X  | 8817583   | 8817560   | 13.68 | Mouse | AGAGGGTCTTACATAAGCCAGGGG<br> |
|    |                      |        |       |       | Human | X  | 38177725  | 38177702  | 15.27 | Human | AGAGGGTCTTACATAAGCCAGGGG     |
| -  | <i>Arntl</i>         | 11865  | RRE   | 0.066 | Mouse | 7  | 100478066 | 100478088 | 20.38 | Mouse | AGGCAGAAAGTAGGTCAGGGACG<br>  |
|    |                      |        |       |       | Human | 11 | 13255933  | 13255955  | 20.38 | Human | AGGCAGAAAGTAGGTCAGGGACG      |
| 1  | <i>Atp1b2</i>        | 11932  | RRE   | 0.066 | Mouse | 11 | 69217609  | 69217631  | 20.61 | Mouse | GCGGAGAAAGTAGGTCAGTCCG<br>   |
|    |                      |        |       |       | Human | 17 | 7495878   | 7495856   | 19.61 | Human | GCGGAGAAAGTAGGTCAGTCCG       |
| 2  | <i>Spsb3</i>         | 79043  | RRE   | 0.083 | Mouse | 17 | 23484948  | 23484970  | 18.81 | Mouse | GAACGGAAAGTGGGTCAGCGCCG<br>  |
|    |                      |        |       |       | Human | 16 | 1772556   | 1772534   | 19.64 | Human | GGGCGGAAAGTGGGTCAGGGCCG      |
| 3  | <i>Zfp318</i>        | 57908  | RRE   | 0.104 | Mouse | 17 | 44564473  | 44564495  | 19.35 | Mouse | GAGAGAAAGTGGGTCATTGAGA<br>   |
|    |                      |        |       |       | Human | 6  | 43417992  | 43417970  | 18.25 | Human | AAGAGAAAGTGGGTCATTGAGC       |
| 4  | <i>Mgea5</i>         | 76055  | RRE   | 0.112 | Mouse | 19 | 45123691  | 45123713  | 17.41 | Mouse | ATCTCCAAAGTAGGTCAGTGTCT<br>  |
|    |                      |        |       |       | Human | 10 | 103568543 | 103568565 | 20.12 | Human | CCATAGAAAGTAGGTCAGTTCTT      |
| 5  | <i>Lasp1</i>         | 16796  | RRE   | 0.139 | Mouse | 11 | 97476169  | 97476191  | 16.54 | Mouse | TTCGTGAAAGTGGGTCATGGTCT<br>  |
|    |                      |        |       |       | Human | 17 | 34284865  | 34284887  | 19.34 | Human | TGTGAGAAAGTGGGTCATGGTCT      |
| 6  | <i>Ryr1</i>          | 20190  | RRE   | 0.148 | Mouse | 7  | 18096374  | 18096352  | 17.94 | Mouse | AGGCTCTGACCTATTTAAATTCT<br>  |
|    |                      |        |       |       | Human | 19 | 43616749  | 43616771  | 17.45 | Human | AGACTCTGACCTATTTAAATTCT      |
| 7  | <i>Adam12</i>        | 11489  | RRE   | 0.148 | Mouse | 7  | 121856769 | 121856791 | 15.44 | Mouse | TACTTAAAGTAGGTCAGAAAAA<br>   |
|    |                      |        |       |       | Human | 10 | 128077170 | 128077148 | 19.88 | Human | AACTTGAAAGTAGGTCAGTAAGA      |
| 8  | <i>A730009L09Rik</i> | 402727 | RRE   | 0.168 | Mouse | 16 | 84900535  | 84900513  | 16.17 | Mouse | TCTTAA TGACCCAATTTCTAAAT<br> |
|    |                      |        |       |       | Human | 21 | 25632353  | 25632331  | 18.49 | Human | TCTTAA TGACCCAATTTCTAAAT     |
| 9  | <i>Myo1b</i>         | 17912  | RRE   | 0.179 | Mouse | 1  | 52270010  | 52269988  | 18.02 | Mouse | TGGTGCTGACCACTTTCTCTTT<br>   |
|    |                      |        |       |       |       |    |           |           |       | Human | GGATATGACCTACTTTCCCTT        |



|    |                   |        |                 |    |       |    |           |           |      |       |                                 |
|----|-------------------|--------|-----------------|----|-------|----|-----------|-----------|------|-------|---------------------------------|
| 11 | <i>C330011F03</i> | 328837 | low-score E-box | -- | Mouse | 17 | 49541248  | 49541231  | 3.08 | Mouse | GTTTCC <b>CACGTG</b> TTTGGC<br> |
|    |                   |        |                 |    | Human | 3  | 17954468  | 17954451  | 3.08 | Human | GTTTCC <b>CACGTG</b> TTTGGC     |
| 12 | <i>Prkce</i>      | 18754  | low-score E-box | -  | Mouse | 17 | 85008129  | 85008146  | 3.20 | Mouse | ATATAA <b>CACGTG</b> CTAAAA<br> |
|    |                   |        |                 |    | Human | 2  | 46068028  | 46068045  | 3.20 | Human | ATATAA <b>CACGTG</b> CTAAAA     |
| 13 | <i>Map3k9</i>     | 338372 | low-score E-box | -  | Mouse | 12 | 77032273  | 77032290  | 2.44 | Mouse | GACAAA <b>CACGTG</b> TGCGTC<br> |
|    |                   |        |                 |    | Human | 14 | 70276648  | 70276665  | 4.03 | Human | GACAAA <b>CACGTG</b> TATGCA     |
| 14 | <i>Zfx1b</i>      | 24136  | low-score E-box | -  | Mouse | 2  | 45057246  | 45057229  | 3.29 | Mouse | GTATTA <b>CACGTG</b> AAAAGC<br> |
|    |                   |        |                 |    | Human | 2  | 145095987 | 145095970 | 3.29 | Human | GTATTA <b>CACGTG</b> AAAAGC     |
| 15 | <i>Ppfibp2</i>    | 19024  | low-score E-box | -  | Mouse | 7  | 94860226  | 94860243  | 4.93 | Mouse | GTTTCC <b>CACGTG</b> TGTCCC<br> |
|    |                   |        |                 |    | Human | 11 | 7489362   | 7489379   | 1.76 | Human | GTTTCC <b>CACGTG</b> TTTGTC     |

The element information including the gene symbol ('Gene'), NCBI GeneID ('GeneID'), element type ('Element'), the position ('Start' and 'End') on a chromosome ('chr') of mouse and human ('Organism'), the sequence alignments of human and mouse ('Sequence') and the match score of HMMER search ('Score of HMMER') are indicated. The estimated accuracy of the HMM-based prediction is indicated as false discovery rate ('FDR'). The mouse elements were used for experimental validation. The element type 'low-score E-box' indicate evolutionary conserved 15 most low-score E-boxes with the core consensus sequence 'CACGTG' in non-coding regions. The function of these element sequences in the context of a luciferase reporter was experimentally determined in **SI Fig. S3**.



**Table S4.** Similarity between DNA binding domains of DNA binding activators and repressors

| Element | Gene          | Alignment                                                                      | Accession   | Domain position | Domain name | Type      | Homology                                      |
|---------|---------------|--------------------------------------------------------------------------------|-------------|-----------------|-------------|-----------|-----------------------------------------------|
| E-box   | <i>Arntl</i>  | -KNAREAHSQIEKRRRDKMNSFIDELASLVPTCNAM--SRKLDKLTVLRMAVQHMKTLR----                | NP_031515.1 | 71-126          | HLH         | Activator | Identity 30%, Similarity 57% to <i>Bhlhb2</i> |
|         | <i>Clock</i>  | DKAKRVSRNKSEKKRRDQFNVLIKELGSMPLGN-----ARKMDKSTVLQKSIDFLRKHKE---                | NP_031741.1 | 32-86           |             | Activator | Identity 22%, Similarity 55% to <i>Bhlhb2</i> |
|         | <i>Bhlhb2</i> | KETYKLPRLIEKKRRDRINECIAQLKDLLPEHLKLTTLGHLEKAVVLELTLKHVKALTNLID                 | NP_035628.1 | 50-112          |             | Repressor | -                                             |
|         |               | : : .: **:***::* * :* .::* ::* .** . ::::                                      |             |                 |             |           |                                               |
| D-box   | <i>Dbp</i>    | KDEKYWSRRYKNNEAAKRSRDARRLKENQISVRAAFLEKENALLRQEVVAVRQE                         | NP_058670.1 | 254-307         | bZIP_2      | Activator | Identity 44%, Similarity 69% to <i>Nfil3</i>  |
|         | <i>Nfil3</i>  | KDAMYWEKRRKNNEAAKRSREKRRLNDLVLENKLIALGEENATLKAELLSLK--                         | NP_059069.1 | 72-123          |             | Repressor | -                                             |
|         |               | ** **_* *****:***:: :. : * :*** * : *:::                                       |             |                 |             |           |                                               |
| RRRE    | <i>Rora</i>   | IPCKICGDKSSGIHYGVITCEGCKGFFRSQQSNATYS-CPRQKNCLIDRTSRNRCQHCRLLQKCLAVGMSRDVAVKFG | NP_038674.1 | 71-146          | zf-C4       | Activator | Identity 65%, Similarity 81% to <i>Nr1d1</i>  |
|         | <i>Nr1d1</i>  | -LCKVCGDVASGFHYGVHACEGCKGFFRSIQQNIQYKRCLKNENCSIVRINRNRCQQCRFKKCLSVGMSRDVAVRFG  | NP_663409.2 | 132-207         |             | Repressor |                                               |
|         |               | **::*** :**::*** :***** * . * * . * :::** * * .*****:** :::***:*****:**        |             |                 |             |           |                                               |

The gene symbol ('Gene') of DNA binding activators and repressors, target element ('Element'), alignment ('Alignment') of DNA binding domain, accession No. ('Accession') of protein sequence, position of DNA binding domain ('Domain position') at the protein sequence and name of the DNA binding domain ('Domain name') are indicated. Homology ('Homology') between DNA binding domains of DNA binding activators and repressors is also indicated.
